# Supplementary material for: Thermally-driven interface engineering of PMo 12 /BiOBr heterojunctions for enhanced artificial photosynthesis of CO 2 in water vapor
Source: Royal Society of Chemistry journal article supplement (doi:10.1039/d5ra02980e), 2025-01-01
Supplement: d5ra02980e1.pdf [file d5ra02980e1.pdf]

# Thermally-Driven Interface Engineering of $\text{PMo}_{12}/\text{BiOBr}$ Heterojunctions for Enhanced Artificial Photosynthesis of $\text{CO}_2$ in water vapor

Yan Shi,<sup>[a]</sup> Shiqin Liu,<sup>[a]</sup> Hui Chen,<sup>[a]</sup> Zaihui Fu,<sup>[b]</sup> Youji Li,<sup>[a]</sup> Senpei Tang<sup>\*[a]</sup>

<sup>a</sup> Hunan Province Key Laboratory of Mineral Cleaner Production And Green Functional Materials, College of Chemistry and Chemical Engineering, Jishou University, Jishou, 416000, Hunan, PR China

<sup>b</sup> College of Chemistry and Chemical Engineering, Hunan Normal University, 410081, Hunan, PR China

## Experimental section

### Reagent

All materials and reagents employed in this investigation analytical grade, comprising bismuth nitrate pentahydrate ( $\text{Bi}(\text{NO}_3)_3 \cdot 5\text{H}_2\text{O}$ , 99%), potassium bromide (KBr, 99%), phosphonic heteropoly acid ( $\text{H}_3\text{PMo}_{12}\text{O}_{40}$ ), ethanol ( $\text{CH}_3\text{CH}_2\text{OH}$ , 99.0%), and tetrabutylammonium hexafluorophosphate ( $\text{TBAPF}_6$ , 98%). Deionized water served as the aqueous medium throughout all experimental procedures.

### Characterization

Crystal structure characterization was performed using a Bruker D8 Advance X-ray diffractometer (XRD) with  $\text{Cu-K}_\alpha$  radiation ( $\lambda=1.5406 \text{ \AA}$ ) in the  $2\theta$  range of  $10^\circ$ – $80^\circ$ . UV-vis diffuse reflectance spectra (DRS) were recorded on a Shimadzu UV-1900i spectrophotometer (200–800 nm wavelength range). Morphological analysis was conducted using a Zeiss Gemini 300 field-emission scanning electron microscope (SEM). Elemental composition and chemical states were determined by Thermo Scientific K-Alpha X-ray photoelectron spectroscopy (XPS). Fourier transform infrared (FT-IR) spectra were acquired using a Vertex 70 spectrometer (4000–400  $\text{cm}^{-1}$ ).

---

\* Corresponding author E-mail address: ChemTangJSU@163.com (Senpei Tang)

## Catalyst synthesis

Synthesis of BiOBr:  $\text{Bi}(\text{NO}_3)_3 \cdot 5\text{H}_2\text{O}$  (4 mmol) was dissolved in 50 mL deionized water with stirring for 0.5 h. A KBr solution (4 mmol in 20 mL  $\text{H}_2\text{O}$ ) was then added dropwise to the solution with continued stirring for 0.5 h. The mixture was transferred to a 100 mL Teflon-lined autoclave and hydrothermally treated at 160 °C for 12 h. After cooling to room temperature, the product was washed with deionized water and ethanol three times, then dried at 60 °C for 24 h to obtain BiOBr (denoted as BOB).

Synthesis of  $t_n\text{-PM/BOB}_x$  composites: As shown in Fig. S1,  $\text{H}_3\text{PM}_{12}\text{O}_{40}$  (PM, 0.1 g) and BOB (0.1 g) were homogeneously ground in an agate mortar for 15 min at 120 rpm rotational frequency. The homogenized mixture was transferred to a alumina combustion boat and calcined in a tube furnace with continuous gas flow (200 mL/min) using a precisely controlled thermal protocol: ramping from room temperature to 200 °C at 5 °C/min, followed by 2 h isothermal annealing. Post-calcination, the system was cooled to 30 °C at 10 °C/min, yielding a green solid denoted as  $t_n\text{-PM/BOB}_x$ , where the subscript “n” represents calcination temperatures (25, 100, 150, 200, 220, 250, 300 °C), and “x” indicates the mass ratio of BOB in the composite (0.16, 0.25, 0.5, 0.75, 0.8).

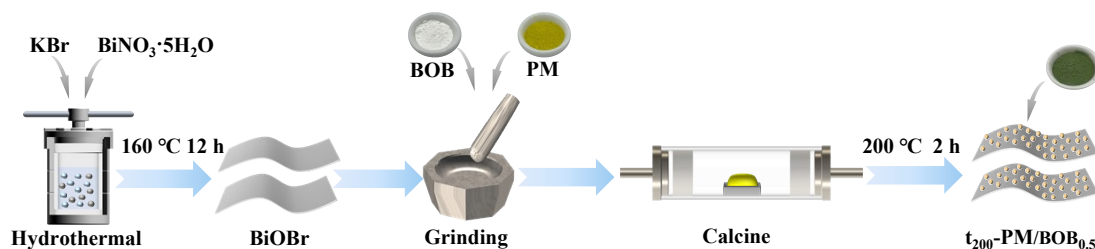

**Fig. S1** Schematic diagram of synthesis process of  $t_n\text{-PM/BOB}_x$ .

## Evaluation of photocatalytic $\text{CO}_2$ reduction performance

A catalyst (10 mg) was dispersed in 1 mL deionized water via sonication. The suspension was deposited onto a circular glass substrate (2 cm diameter) using a spin-coating method, followed by ambient drying for 12 h to form a uniform catalytic film. This film was then suspended in a gas-tight quartz reactor containing 5 mL deionized water, ensuring physical separation between the film and aqueous phase (Fig. S2a). Prior to illumination, the reactor was evacuated to remove residual air and purged with

high-purity CO<sub>2</sub> (99.999 %). The total volume of the reactor with gas pipelines is 550 mL. The CO<sub>2</sub> partial pressure in the reactor was maintained within the range of 2.0-18.4 kPa (2-18 vol%), with a stable flow velocity of 20 mL·min<sup>-1</sup>. Temperature control was maintained at 25±5 °C using a recirculating chiller system. Photocatalytic reactions were driven by a 300 W xenon lamp equipped with an AM 1.5G filter (light intensity: 117.22 mW·cm<sup>-2</sup>). Reaction products were automatically sampled at 30-min intervals through an online gas chromatograph (GC9790plus, FULI INSTRUMENTS, China) equipped with a FID. Quantification was performed using pre-calibrated standard curves as detailed in Fig. S2b.

### **Characterization of photochemical properties**

The catalyst (10 mg) was ultrasonically dispersed in 2 mL ethanol containing 30 μL Nafion solution (5 wt%) to form a homogeneous suspension, followed by immersion of a 1×2 cm FTO glass substrate into the mixture. Uniform catalyst loading was achieved via centrifugation at 8000 rpm, and the coated substrate was air-dried to form a catalytic film. Photoelectrochemical measurements were conducted in a three-electrode system (Pt counter electrode, Ag/AgCl reference electrode) using 0.25 mmol·L<sup>-1</sup> tetrabutylammonium hexafluorophosphate as electrolyte under illumination from a 300 W xenon lamp. Transient photocurrent (PTC) was recorded over 200 s with 20 s light chopping intervals, while electrochemical impedance spectroscopy (EIS) and Mott-Schottky (M-S) analyses were performed in frequency ranges of 0.01 Hz–100 kHz and potential windows of OCP ±1 V, respectively, utilizing a CHI 660I electrochemical workstation.

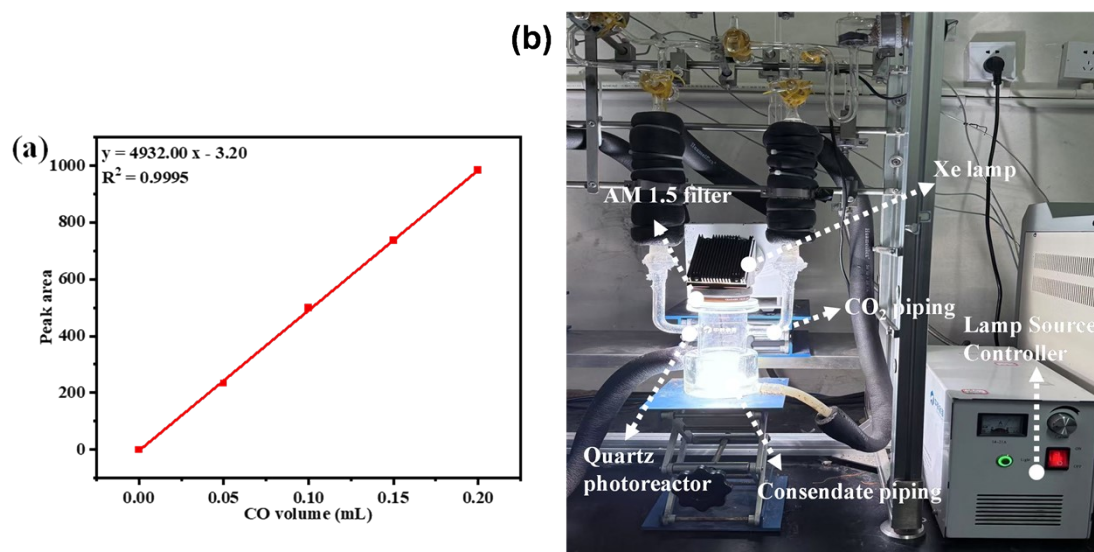

**Fig. S2.** (a) CO quantification standard curve derived from gas chromatography analysis and (b) Photos of the photocatalytic CO<sub>2</sub> reduction reactor

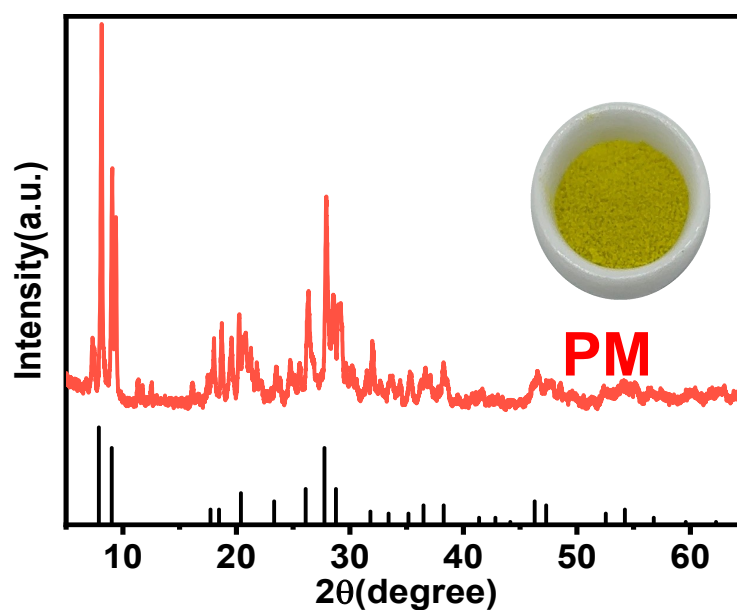

**Fig. S3** The XRD pattern of PM, and inset is photograph of yellow PM powder.

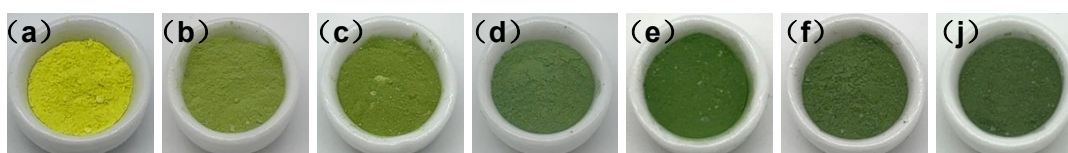

**Fig. S4** Color change diagram of catalyst t<sub>n</sub>-PM/BOB<sub>0.5</sub> (n= 25, 100, 150, 200, 220, 250, 300 °C) at different temperatures

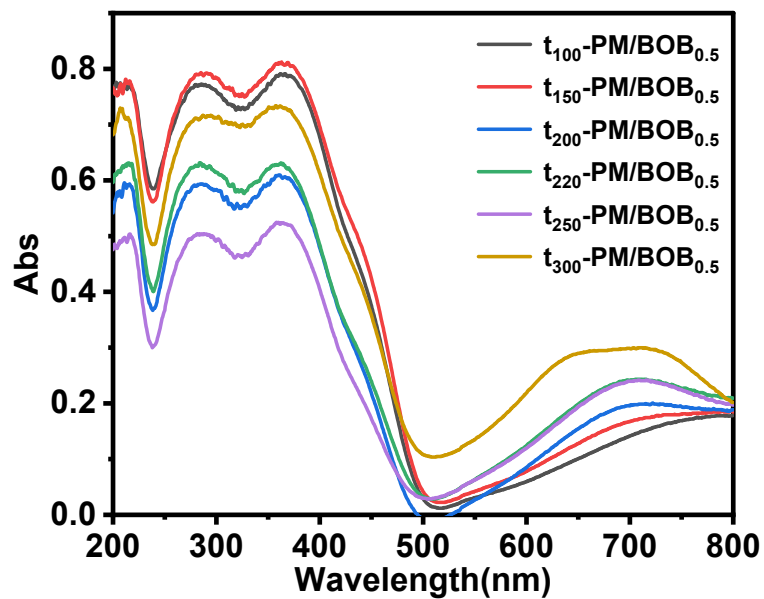

**Fig. S5** UV-vis DRS spectra of  $t_n$ -PM/BOB<sub>0.5</sub> composites synthesized at different calcination temperatures

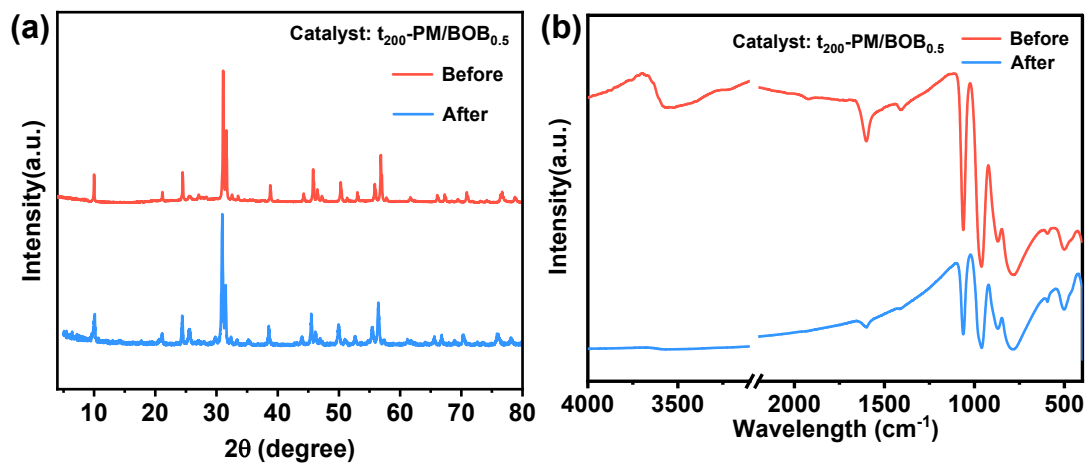

**Fig.S6** Comparison of (a) XRD and (b) IR patterns of composite materials before and after photocatalytic CO<sub>2</sub> reduction reactions

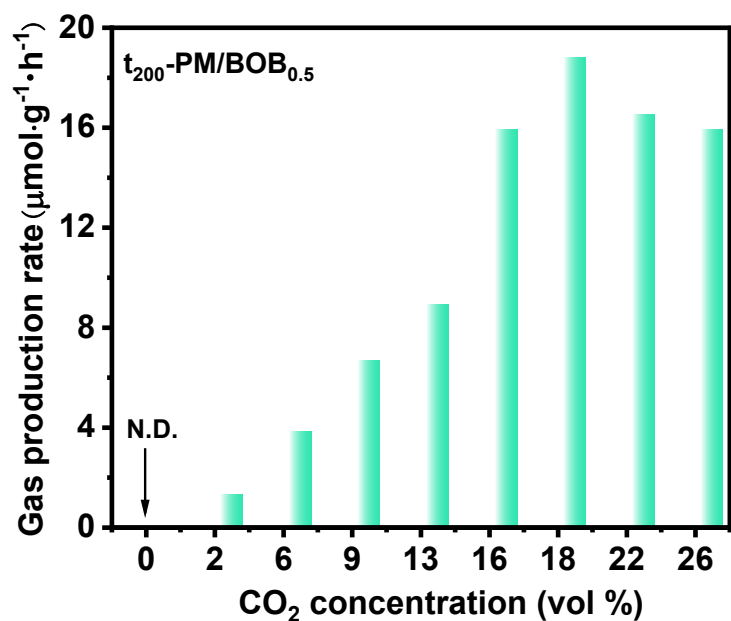

**Fig. S7** The photocatalytic performance of  $t_{200}$ -PM/BOB<sub>0.5</sub> under varying CO<sub>2</sub> concentrations

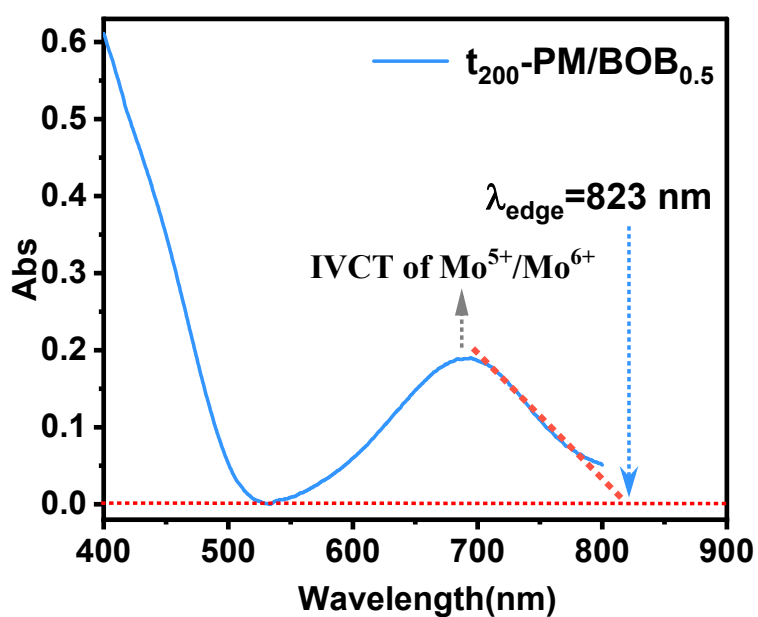

**Fig. S8** The UV-vis DRS of  $t_{200}$ -PM/BOB<sub>0.5</sub>

**Table 1** Comparison of PCR performance with comparable materials under solid-gas mode

| Light source             | Photocatalyst                    | CO                                    | Refs.                           |
|--------------------------|----------------------------------|---------------------------------------|---------------------------------|
|                          |                                  | μmol·g <sup>-1</sup> ·h <sup>-1</sup> |                                 |
| A 300 W Xe lamp (AM 1.5) | $t_{200}$ -PM/BOB <sub>0.5</sub> | 18.82                                 | <b>This work</b>                |
| A 300 W Xe lamp          | 8% P-BiOBr                       | 9.13                                  | Journal of Molecular Structure, |

|                                                                          |                                                                                      |       |                                                                                        |
|--------------------------------------------------------------------------|--------------------------------------------------------------------------------------|-------|----------------------------------------------------------------------------------------|
|                                                                          |                                                                                      |       | 2024, 1307: 138041<br>Separation and Purification<br>Technology, 2024, 344:<br>127289. |
| 300 W Xe lamp                                                            | BiOBr/NH <sub>2</sub> -UiO-66                                                        | 9.2   | ACS Catalysis, 2022, 12(7):<br>3965-3973.                                              |
| 300 W Xe lamp<br>(AM 1.5G filter)                                        | Bi <sub>4</sub> O <sub>5</sub> Cl <sub>2</sub>                                       | 14.6  | Separation and Purification<br>Technology, 2022, 298:<br>121603.                       |
| 300 W Xe lamp<br>(420 nm cut-off<br>filter)                              | BiOBr/CdS-5%                                                                         | 4.5   | Applied Catalysis B:<br>Environment and Energy,<br>2025, 365: 124904.                  |
| 300 W Xe lamp                                                            | NiTMCPP/BiOBr-2                                                                      | 2.8   | J. Mater. Chem. A., 2022,10,<br>15752-15765                                            |
| 300 W Xe lamp ( $\lambda$<br>> 420 nm)                                   | Ni <sub>2</sub> P/NiO/CN                                                             | 1.51  | Angewandte Chemie<br>International Edition, 2025,<br>64(2): e202414672.                |
| 300 W Xe lamp                                                            | WO <sub>3-x</sub> /In <sub>2</sub> S <sub>3</sub> -550                               | 10    | Appl. Catal. B-Environ., 201<br>(2017) 629–635.                                        |
| 300 W Xe lamp                                                            | LaPO <sub>4</sub> /g-C <sub>3</sub> N <sub>4</sub>                                   | 14.43 | Journal of Rare Earths, 2024,<br>1002-0721                                             |
| 300 W Xe lamp                                                            | 5 wt% g-C <sub>3</sub> N <sub>4</sub> /CeO <sub>2</sub>                              | 7.61  | ACS Nano 2020., 14,<br>8584–8593                                                       |
| 300 W Xe lamp<br>(AM1.5)                                                 | Cu/CN-0.25                                                                           | 11.21 | Sep. Purif. Technol. 2023, 321,<br>124228                                              |
| A 300 W Xe lamp                                                          | SiW <sub>12</sub> -BiOBr                                                             | 21    | Chem. Eng. J. 2022, 442,<br>136157                                                     |
| A 300 W Xe lamp<br>(full spectrum)                                       | {CuI <sub>8</sub> } - {PMo <sub>8</sub> V <sub>6</sub> O <sub>42</sub> }             | 20.06 | Sep. Purif. Technol. 2023, 321,<br>124228                                              |
| A 300 W Xe lamp<br>(200 mW·cm <sup>-2</sup> )                            | SiW <sub>12</sub> -Bi <sub>2</sub> WO <sub>6</sub>                                   | 16.2  | JACS Au. 2021, 1, 8, 1288–<br>1295                                                     |
| A 300 W Xe lamp<br>( $\lambda$ =300-1100nm,<br>200 mW·cm <sup>-2</sup> ) | {M <sub>3</sub> L <sub>8</sub> }- {PMo <sub>9</sub> V <sub>7</sub> O <sub>44</sub> } | 15.5  | Adv. Mater. Interfaces, 2018,<br>5, 1801062.                                           |
| A 300 W Xe lamp<br>( $\lambda$ >400 nm)                                  | Au@NENU-10                                                                           | 12.8  | Nanoscale Adv., 2024,6, 1241-<br>1245                                                  |
| 200W Hg-Xe<br>lamp with<br>guidance fiber                                | Zn–Cr LDHs/SiW <sub>12</sub>                                                         | 0.05  |                                                                                        |
